# Annals of Oncology

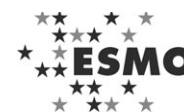

Official Journal of the  
European Society for Medical Oncology

---

## Volume 18, 2007 Supplement 7

2007 World Congress on Gastrointestinal Cancer

*28 June–July 1, 2007: Barcelona, Spain*

Organized by Imedex, Inc. in partnership with the European Society for Medical Oncology

### **symposium article**

The management of pancreatic cancer. Current expert opinion and recommendations derived from the 8th World Congress on Gastrointestinal Cancer, Barcelona 2006

viii

### **abstracts**

Oral presentations

vii11

Poster discussions

vii24

Posters

vii32

Author index

vii25
